# Supplementary material for: The synthesis and oligomerization of a monofunctional bottlebrush-shaped polymer terminated with an azide group
Source: Royal Society of Chemistry journal article supplement (doi:10.1039/c9py00985j), 2019-01-01
Supplement: c9py00985j1.pdf [file c9py00985j1.pdf]

## Supplementary Information

# **The synthesis and oligomerization of a monofunctional bottlebrush-shaped polymer terminated with an azide group**

Youfu Wang,<sup>\*a,b</sup> Rui Li,<sup>a</sup> Yawen Bian,<sup>a</sup> Xueli Zhang<sup>b</sup> and Xinyuan Zhu<sup>\*a</sup>

<sup>a</sup> School of Chemistry and Chemical Engineering, State key Laboratory of Metal Matrix Composites, Shanghai Jiao Tong University, 800 Dongchuan Road, Shanghai, 200240, China.

<sup>b</sup> Joint Research Center for Precision Medicine, Shanghai Jiao Tong University Affiliated Sixth People's Hospital South Campus, 6600 Nanfeng Road, Shanghai 201499, People's Republic of China.

E-mail: (Y. Wang) wyfown@sjtu.edu.cn; (X. Zhu) xyzhu@sjtu.edu.cn.

## EXPERIMENT SECTION

**Materials and Characterization** Styrene (St, Adamas, 99%) was washed with 5 % NaOH aqueous solution and water successively, then dried over anhydrous MgSO<sub>4</sub> and CaH<sub>2</sub> sequentially, and finally distilled under reduced pressure. *tert*-Butyl acrylate (*t*BA, 99%) and 2-butanone was dried by CaH<sub>2</sub> and distilled under reduced pressure prior to use. CuBr (98%, Sigma-Aldrich) was stirred in acetic acid overnight, filtered, then washed with ethanol and diethyl ether successively, and finally dried under vacuum. N,N'-Azobis(isobutyronitrile) (AIBN) was purified by recrystallization from ethanol. 2-Hydroxyethyl acrylate (HEA, Aladdin, 97%), N,N,N',N'',N'''-pentamethyldiethylenetriamine (PMDETA, 99%), 2-bromoisobutryl bromide (98%), DBCO-NHS ester, PEG<sub>20K</sub> with linear and three-arm structures terminated with amino groups (95%, 9i Technology Co., Ltd, China) were commercial available and used as received. All other reagents were of analytical grade and used as received.

<sup>1</sup>H NMR and <sup>13</sup>C NMR spectra were recorded on a Varian MERCURY plus-400 spectrometer with deuterated chloroform (CDCl<sub>3</sub>) as the solvents at 298 K. The chemical shifts were referenced to residual peaks of TMS. Fourier transform infrared (FT-IR) spectra were measured as KBr pellets on a Perkin Elmer Spectrum 100 FTIR spectrometer (U.K.) in the range of 4000-450 cm<sup>-1</sup>. The molecular weight and polydispersity index (PDI) of the polymers were determined by size exclusion chromatography on a Malvern GPC with polystyrene as standard. Tetrahydrofuran (THF) was used as the eluent at a flow

rate of 1.0 mL/min at 35 °C. Atomic force microscopy (AFM) measurements were performed on a Burkert Multimode Nanoscope III atomic force microscope.

### Synthetic Details

**CTA-N3** was synthesized by esterification between 2-(propylthiocarbonothioylthio)-2-methylpropionic acid<sup>1-2</sup> and 2-[2-(2-azidoethoxy)ethoxy]ethanol<sup>3</sup>. The <sup>1</sup>H- and <sup>13</sup>C-NMR spectra of CTA-N3 in CDCl<sub>3</sub> were shown in **Fig. S1**. <sup>1</sup>H-NMR (400 MHz, CDCl<sub>3</sub>, ppm)  $\delta$  4.28–4.23 (m, 2H), 3.72–3.61 (m, 8H), 3.39 (t,  $J = 5.1$  Hz, 2H), 3.26 (dd,  $J = 7.6, 6.9$  Hz, 2H), 1.70 (s, 8H), 1.00 (t,  $J = 7.4$  Hz, 3H). <sup>13</sup>C-NMR (100 MHz, CDCl<sub>3</sub>, ppm)  $\delta$  172.97, 70.75, 70.14, 68.96, 65.17, 55.98, 50.76, 38.75, 25.37, 21.51, 13.54.

**BIEA** was synthesized according to previous reports<sup>4-5</sup> and further purified by distilling under reduced pressure. The <sup>1</sup>H- and <sup>13</sup>C-NMR spectra of BIEA in CDCl<sub>3</sub> were shown in **Fig. S2**. <sup>1</sup>H-NMR (400 MHz, CDCl<sub>3</sub>, ppm)  $\delta$  6.43 (dd,  $J = 17.3, 1.4$  Hz, 1H), 6.13 (dd,  $J = 17.3, 10.5$  Hz, 1H), 5.86 (dd,  $J = 10.4, 1.4$  Hz, 1H), 4.42 (s, 4H), 1.92 (s, 6H). <sup>13</sup>C-NMR (100 MHz, CDCl<sub>3</sub>, ppm)  $\delta$  171.34, 165.67, 131.41, 127.85, 63.42, 61.67, 55.31, 30.58.

**Monofunctional Polymer Brushes** were synthesized by sequential reversible addition fragmentation chain transfer (RAFT) polymerization and atom transfer radical polymerization (ATRP).

**PS-N3 (P1-N3)** was synthesized by RAFT polymerization at 60 °C for 16 hours with styrene (10.4 g, 100 mmol), CTA-N3 (56 mg, 0.10 mmol) and AIBN (4.9 mg, 0.03 mmol) after freeze-pump-thaw three times. The polymerization was

quenched by liquid nitrogen, precipitated in methanol three times and dried under vacuum at 50 °C overnight.

**PBIEA-*b*-PS-N3 (P2-N3)** was prepared by RAFT polymerization at 60 °C for 22 hours with P1-N3 (400 mg, 0.02 mmol) as macromolecular CTA, AIBN (0.5 mg, 0.003 mmol) and BIEA (1.06 g, 4 mmol) in 2-butanone (0.8 mL) after freeze-pump-thaw three times. The polymerization was quenched by liquid nitrogen, precipitated in methanol three times and dried under vacuum at 50 °C overnight.

**(PBIEA-*g*-P*t*BA)-*b*-PS-N3 (P3-N3)** was obtained by ATRP at 60 °C for 4 hours with P2-N3 (145 mg, 0.004 mmol, 0.24 mmol Br), CuBr (69 mg, 0.48 mmol), PMDETA (100 μL, 0.48 mmol) and *t*BA (7.0 mL, 48 mmol) in 2-butanone (7 mL). P3-N3 was obtained after quenching with liquid nitrogen, passing through neutral aluminum oxide column, precipitating in cold methanol/water (v:v = 4:1) and drying under vacuum at 50 °C overnight.

**PEG<sub>20K</sub>-(DBCO)<sub>2</sub>** was synthesized according to previous reports<sup>6-7</sup>. NH<sub>2</sub>-PEG<sub>20K</sub>-(NH<sub>2</sub>)<sub>2</sub> (200 mg, 0.01 mmol), DBCO-NHS ester (64 mg, 0.16 mmol) and trimethylamine (5 μL) were dissolved in CH<sub>2</sub>Cl<sub>2</sub> (3 mL) and stirred at room temperature for 72 hours. Then the solution was precipitated in cold diethyl ether and centrifuged to remove the excess DBCO-NHS. PEG<sub>20K</sub>-(DBCO)<sub>2</sub> was obtained after drying under vacuum at 50 °C overnight. The <sup>1</sup>H-NMR spectrum of PEG<sub>20K</sub>-(DBCO)<sub>2</sub> in CDCl<sub>3</sub> were shown in **Fig. S7**.

**PEG<sub>20K</sub>-(DBCO)<sub>3</sub>** was synthesized similar with PEG-(DBCO)<sub>2</sub> with three-arm PEG<sub>20K</sub> terminated with amino groups. Generally, PEG<sub>20K</sub>-(NH<sub>2</sub>)<sub>3</sub> (120 mg,

0.006 mmol), DBCO-NHS ester (64 mg, 0.16 mmol) and trimethylamine (5  $\mu$ L) were dissolved in  $\text{CH}_2\text{Cl}_2$  (3 mL) and stirred at room temperature for 72 hours. Then the solution was precipitated in cold diethyl ether and centrifuged to remove the excess DBCO-NHS.  $\text{PEG}_{20\text{K}}\text{-(DBCO)}_3$  was obtained after drying under vacuum at 50  $^\circ\text{C}$  overnight. The  $^1\text{H-NMR}$  spectrum of  $\text{PEG}_{20\text{K}}\text{-(DBCO)}_3$  in  $\text{CDCl}_3$  were shown in **Fig. S8**.

**Polymer brush dimer (P3-P3)** was synthesized by click reaction between P3-N3 (140 mg, 1  $\mu$ mol calculated from NMR) and  $\text{PEG}_{20\text{K}}\text{-(DBCO)}_2$  (10 mg, 0.5  $\mu$ mol) with molar ration 2:1 in  $\text{CH}_2\text{Cl}_2$  (20 mL) and stirred at 50  $^\circ\text{C}$  for 72 hours. Then the solution was cold to room temperature and dry under vacuum for characterizations.

**Polymer brush trimer** was synthesized by click reaction between P3-N3 (140 mg, 1  $\mu$ mol calculated from NMR) and  $\text{PEG}_{20\text{K}}\text{-(DBCO)}_3$  (6.6 mg, 0.33  $\mu$ mol) with molar ration 3:1 in  $\text{CH}_2\text{Cl}_2$  (20 mL) and stirred at 50  $^\circ\text{C}$  for 72 hours. Then the solution was cold to room temperature and dry under vacuum for characterizations.

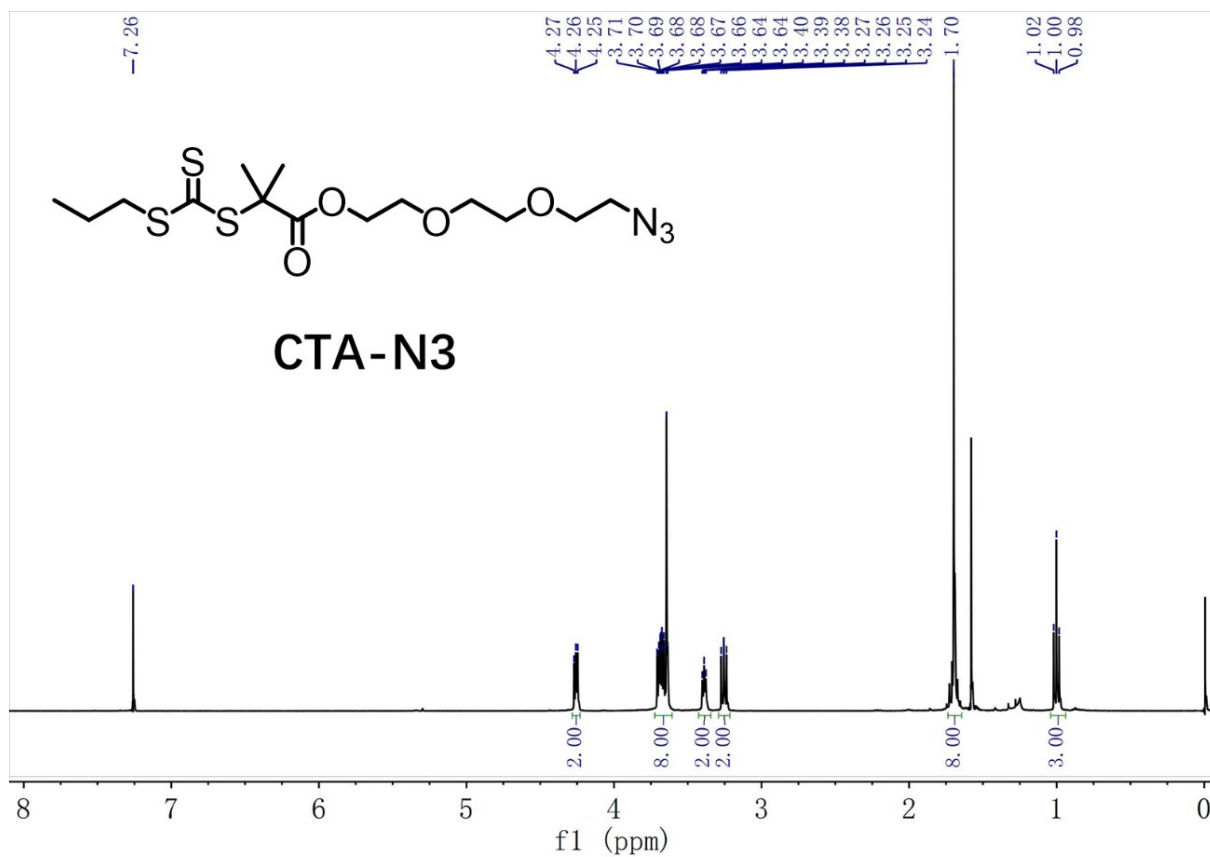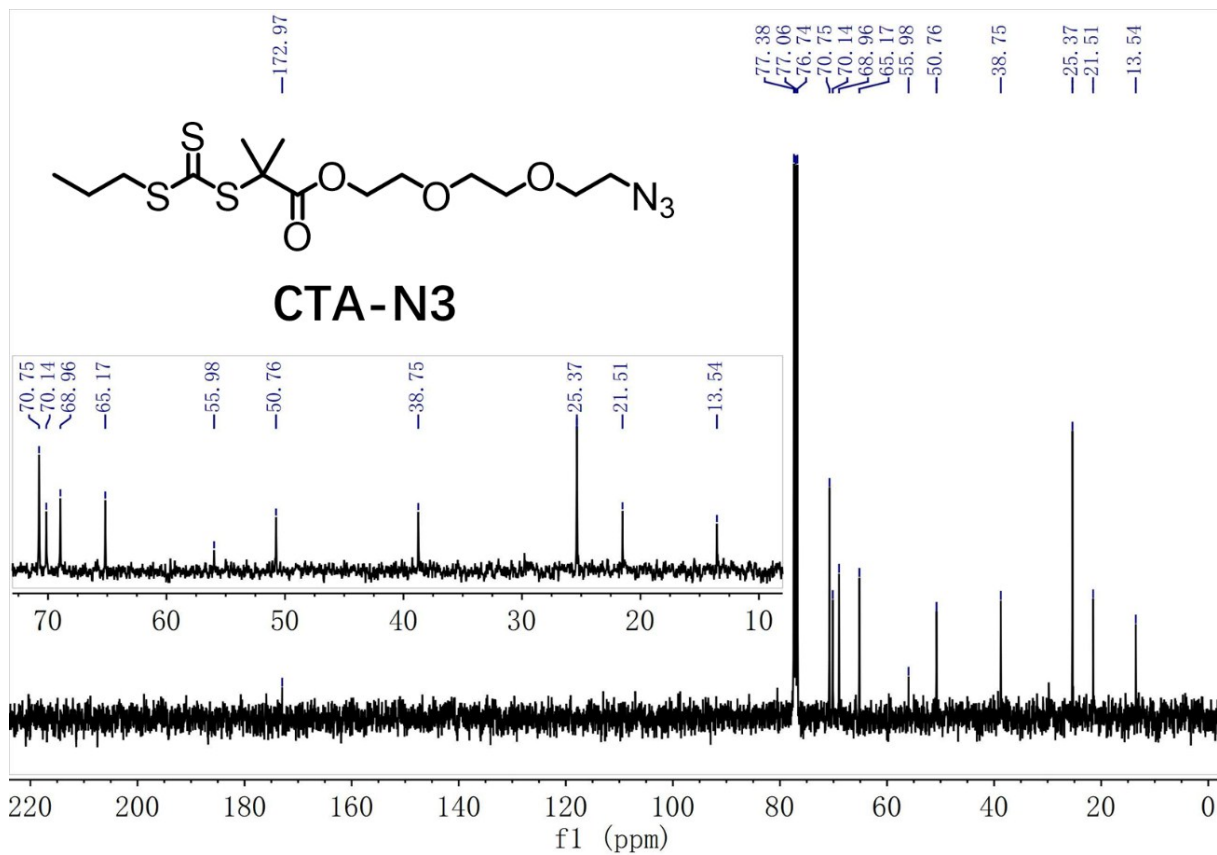

**Fig. S1**  $^1\text{H}$ - and  $^{13}\text{C}$ -NMR spectra of **CTA-N3** in  $\text{CDCl}_3$ .

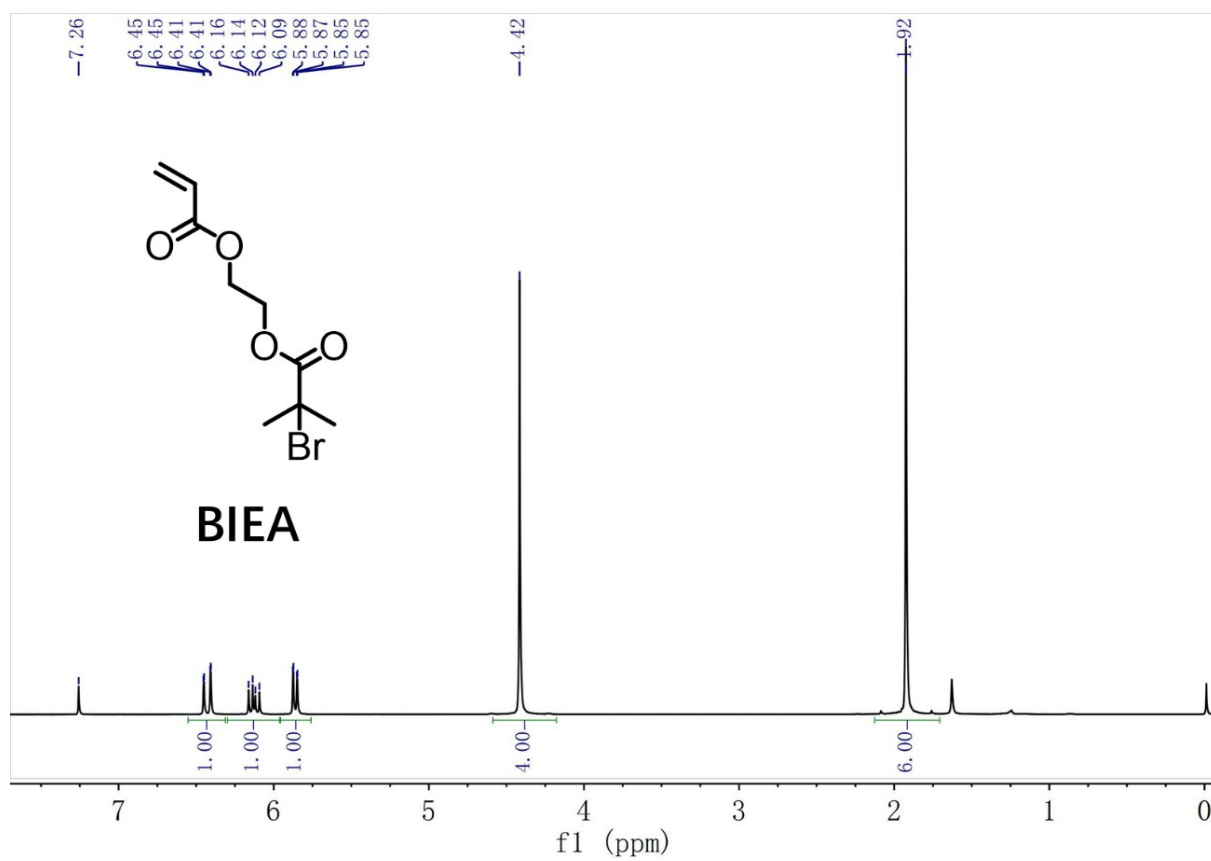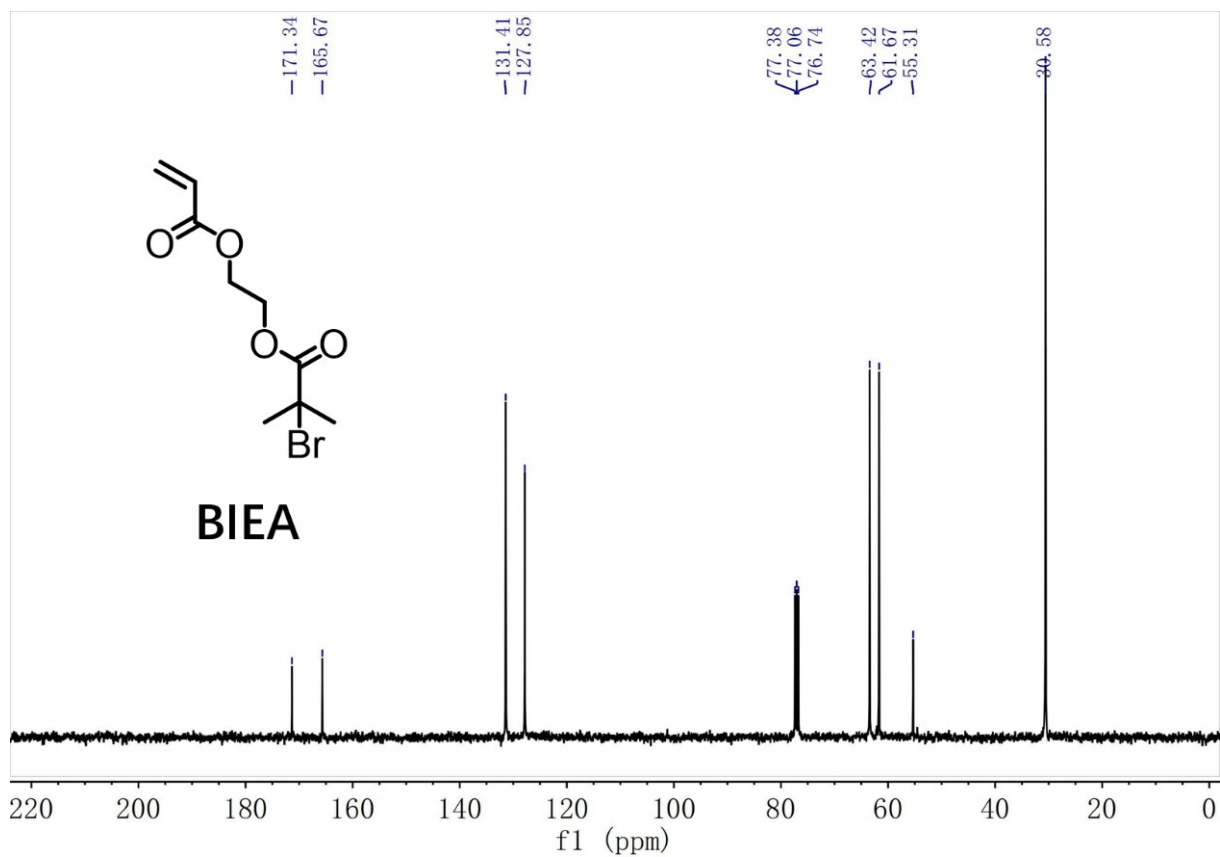

**Fig. S2** <sup>1</sup>H- and <sup>13</sup>C-NMR spectra of monomer, **BIEA**, in CDCl<sub>3</sub>.

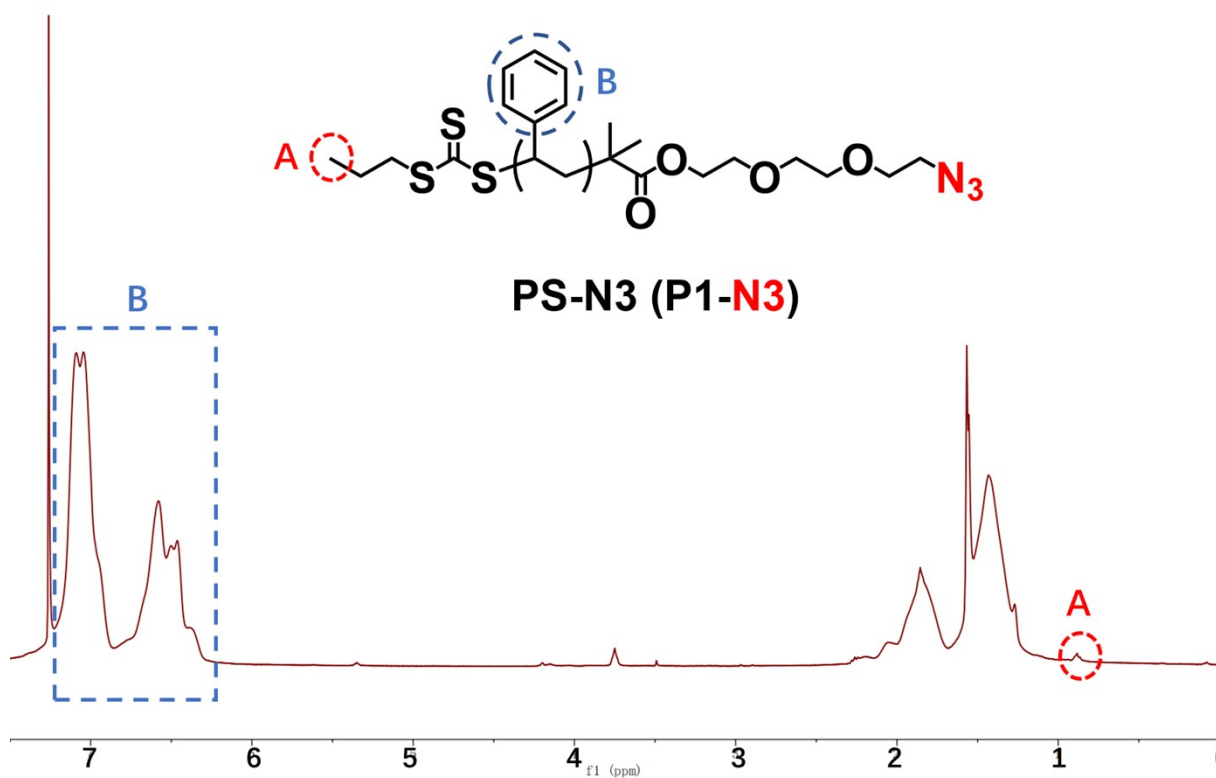

**Fig. S3**  $^1\text{H-NMR}$  spectrum of PS-N3 (**P1-N3**) in  $\text{CDCl}_3$ .

$M_{n,P1-N3}$  of **PS-N3 (P1-N3)** was calculated from  $^1\text{H-NMR}$  data (**Fig. S3**) based on the following equation:

$$M_{n,P1-N3} = \frac{I_B/5}{I_A/3} \times 104.15 + M_{n,CTA-N3}$$

$I_B$  and  $I_A$  are the integral area of the protons in phenyl group within PS chains and the integral area of the terminal methyl protons at the P1-N3, respectively. 104.15 is the molecular weight of unit styrene.



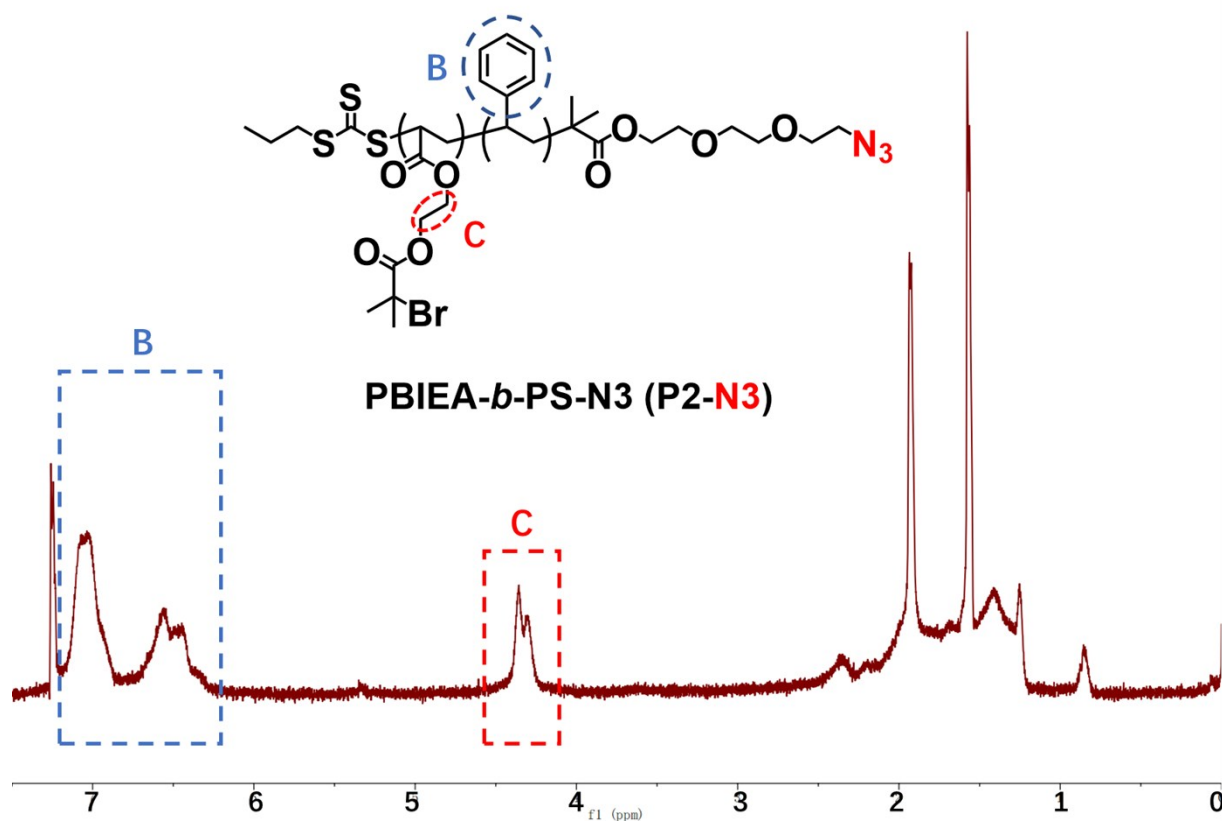

**Fig. S4**  $^1\text{H-NMR}$  spectrum of PBIEA-*b*-PS-N3 (**P2-N3**) in  $\text{CDCl}_3$ .

$M_{n,P2-N3}$  of PBIEA-*b*-PS-N3 (**P2-N3**) was calculated from  $^1\text{H-NMR}$  data (**Fig. S4**)

based on the following equation:

$$M_{n,P2-N3} = \frac{I_C/4}{I_B/5} \times \frac{M_{n,P1-N3} - M_{n,CTA-N3}}{104.15} \times 265.10 + M_{n,P1-N3}$$

$I_C$  and  $I_B$  are the integral area of the protons in methylene groups within the PBIEA block and the integral area of the protons in phenyl group within PS block, respectively. 104.15 and 265.10 are the molecular weights of unit styrene and BIEA, respectively.

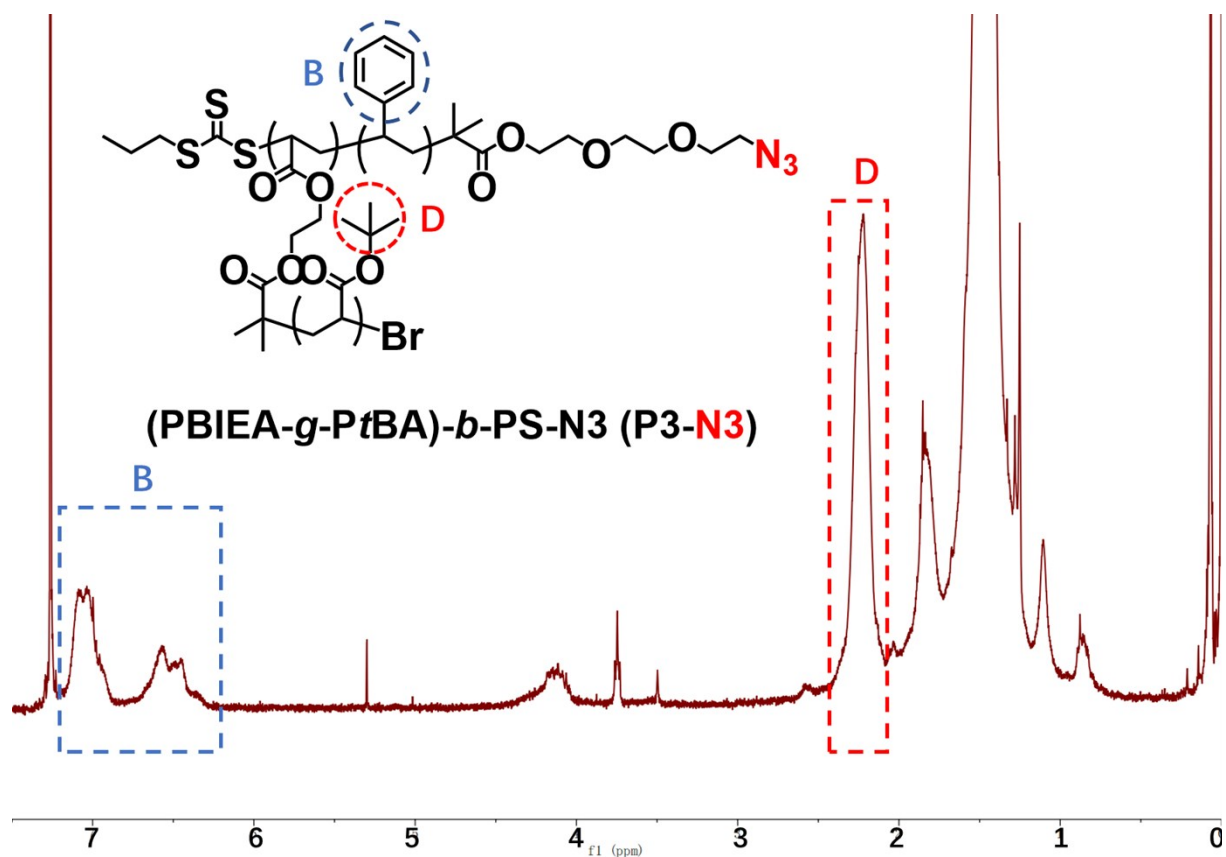

**Fig. S5**  $^1\text{H-NMR}$  spectrum of (PBIEA-*g*-PtBA)-*b*-PS-N3 (**P1-N3**) in  $\text{CDCl}_3$ .

$M_{n,P3-N3}$  of (PBIEA-*g*-PtBA)-*b*-PS-N3 (**P3-N3**) was calculated from  $^1\text{H-NMR}$  data (**Fig. S5**) based on the following equation:

$$M_{n,P3-N3} = \frac{I_D/9}{I_B/5} \times \frac{M_{n, P1-N3} - M_{n, CTA-N3}}{104.15} \times 128.17 + M_{n, P2-N3}$$

$I_D$  and  $I_B$  are the integral area of the protons in tertiary butyl groups within the PtBA brush and the integral area of the protons in phenyl group within PS block, respectively. 104.15 and 128.17 are the molecular weights of unit styrene and *t*BA, respectively.

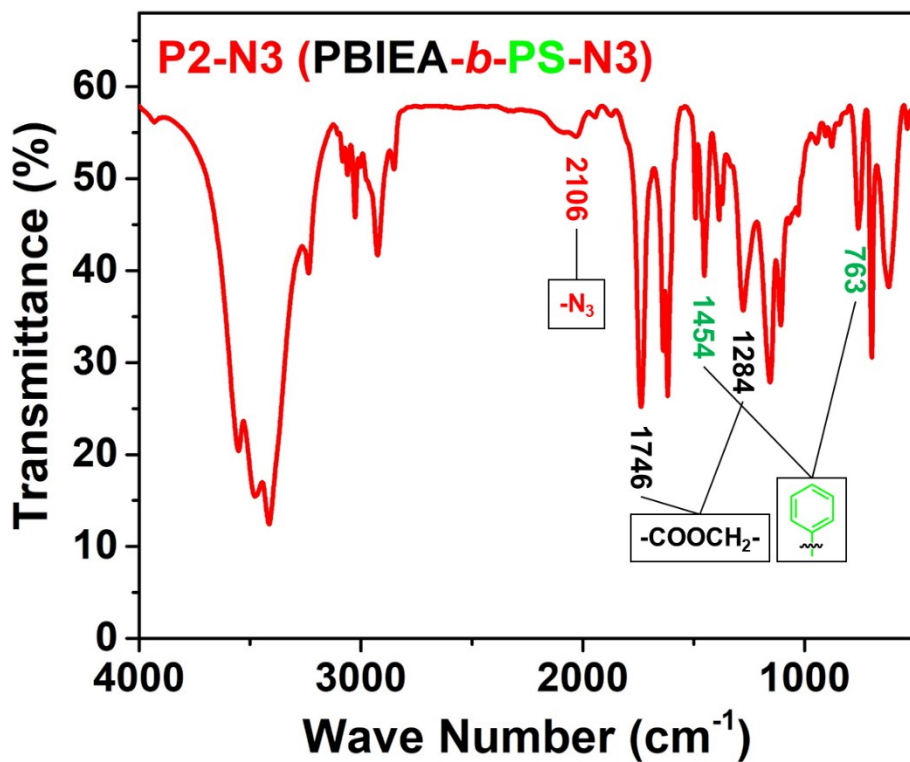

Fig. S6 FT-IR spectrum of P2-N3.

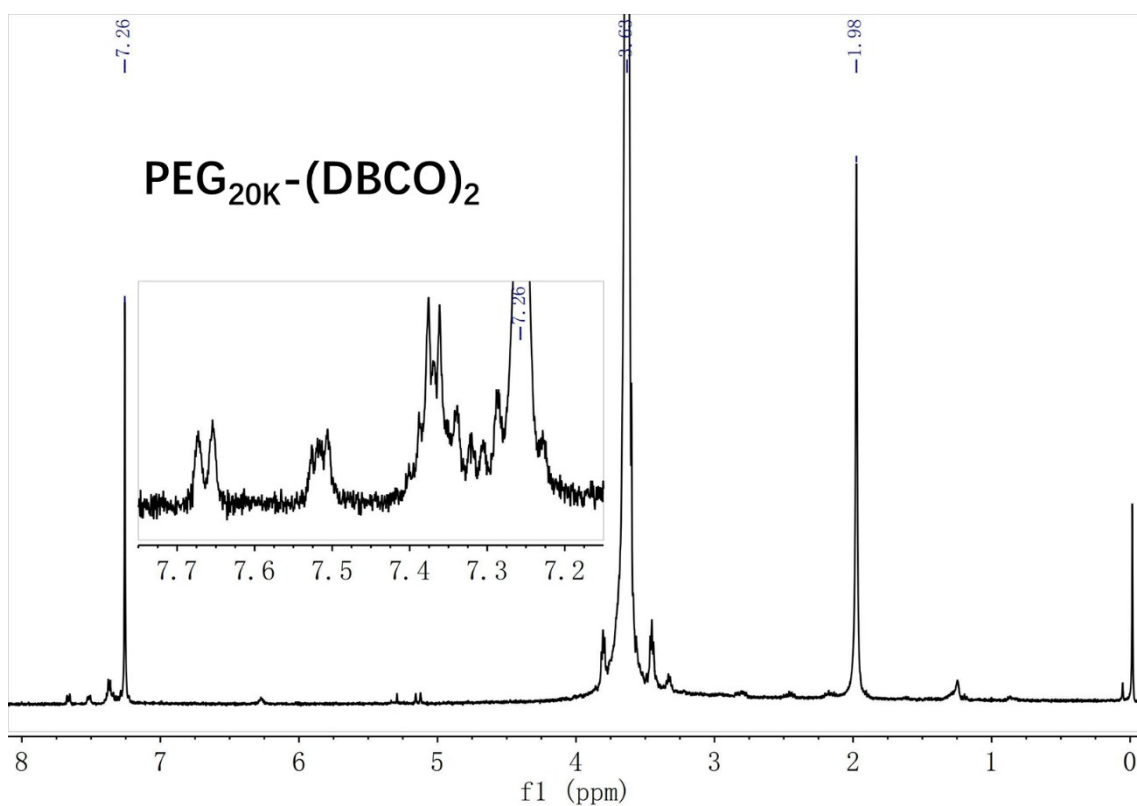

Fig. S7  $^1\text{H-NMR}$  spectrum of PEG<sub>20K</sub>-(DBCO)<sub>2</sub> in  $\text{CDCl}_3$ .

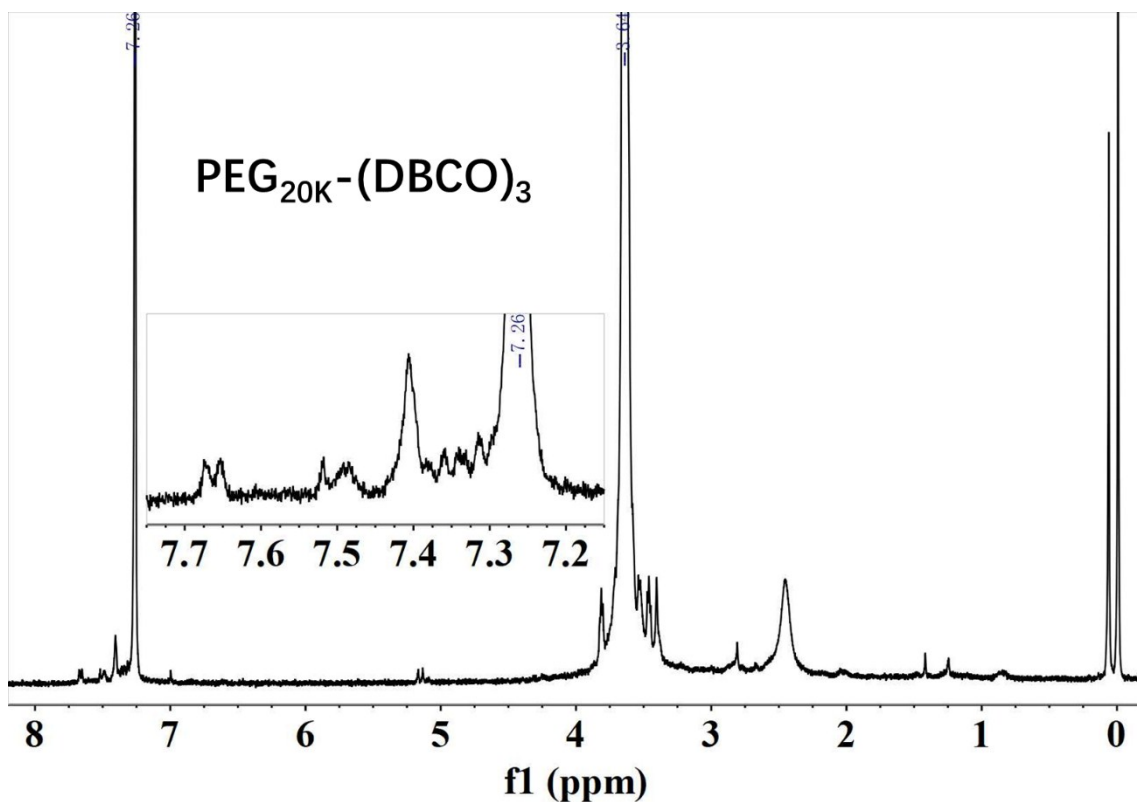

Fig. S8 <sup>1</sup>H-NMR spectrum of PEG<sub>20K</sub>-(DBCO)<sub>3</sub> in CDCl<sub>3</sub>.

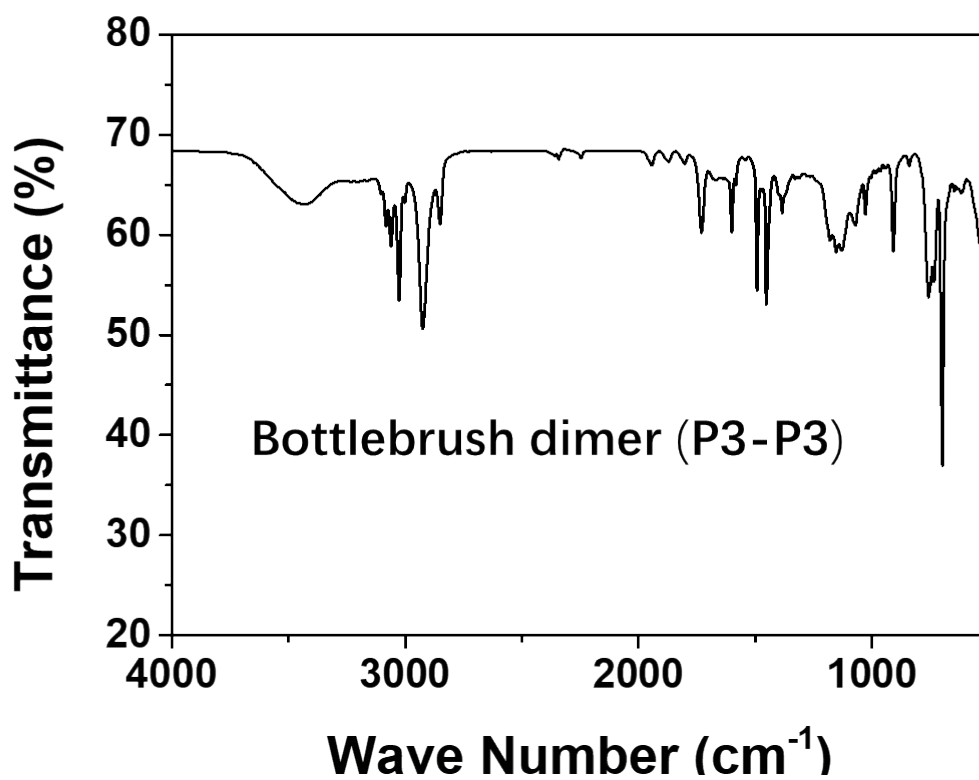

Fig. S9 FT-IR spectrum of bottlebrush dimer (P3-P3).

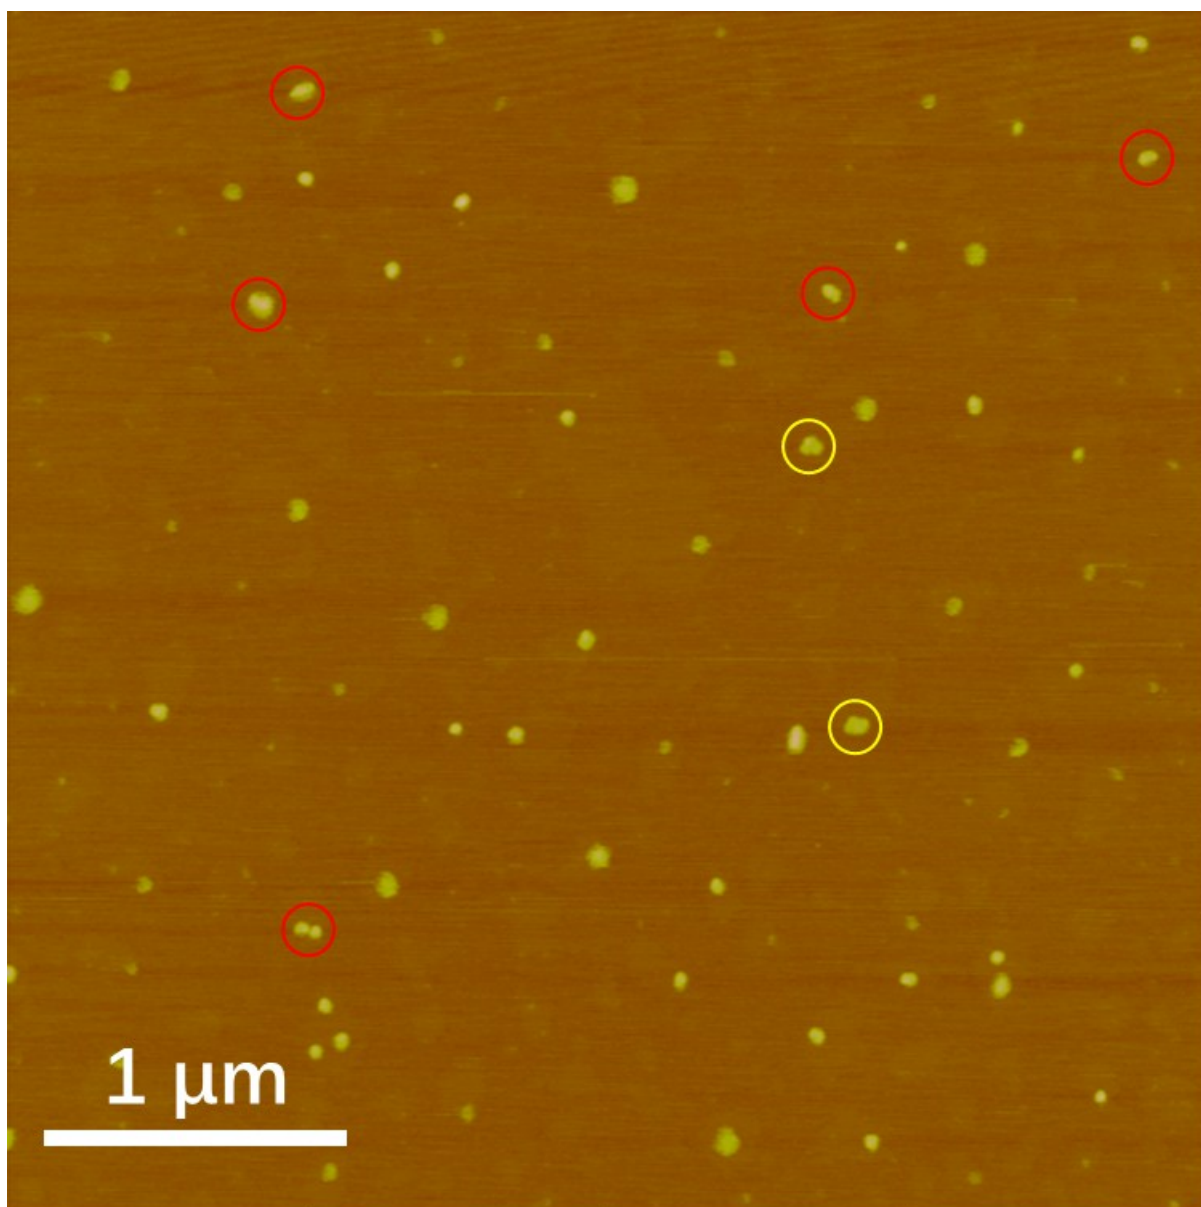

**Fig. S10** AFM image of **bottlebrush trimer** associated with dimer and unimer.

## Supplementary References

1. Zhang, K.; Zha, Y.; Peng, B.; Chen, Y.; Tew, G. N., Metallo-Supramolecular Cyclic Polymers. *J. Am. Chem. Soc.* **2013**, *135* (43), 15994–15997.
2. Chapman, R.; Gormley, A. J.; Herpoldt, K.-L.; Stevens, M. M., Highly Controlled Open Vessel RAFT Polymerizations by Enzyme Degassing. *Macromolecules* **2014**, *47* (24), 8541–8547.
3. Brun, M. A.; Tan, K.-T.; Griss, R.; Kielkowska, A.; Reymond, L.; Johnsson, K., A Semisynthetic Fluorescent Sensor Protein for Glutamate. *J. Am. Chem. Soc.* **2012**, *134* (18), 7676–7678.
4. Jones, M. W.; Gibson, M. I.; Mantovani, G.; Haddleton, D. M., Tunable thermo-responsive polymer-protein conjugates via a combination of nucleophilic thiol-ene “click” and SET-LRP. *Poly. Chem.* **2011**, *2* (3), 572–574.
5. Lin, H.-C.; Lin, J.-J.; Sheng, Y.-J., Interaction of Novel Fluorescent Nanoscale Ionic Silicate Platelets with Biomaterials for Biosensors. *ACS Appl. Mater. Inter.* **2015**, *7* (20), 10771–10778.
6. Meeuwissen, S. A.; Debets, M. F.; van Hest, J. C. M., Copper-free click chemistry on polymersomes: pre- vs. post-self-assembly functionalisation. *Poly. Chem.* **2012**, *3* (7), 1783–1795.
7. Azagarsamy, M. A.; Anseth, K. S., Wavelength - Controlled Photocleavage for the Orthogonal and Sequential Release of Multiple Proteins. *Angew. Chem. Int. Ed.* **2013**, *52* (51), 13803–13807.
